# Supplementary material
Source: MDPI journal article supplement (https://www.mdpi.com/2071-1050/11/22/6261)
Supplement: s1 [file s1]

### **Questionnaires consent form**

I would be appreciated for accepting to participate in this survey.

The questionnaires aim to explore the significant determinants which affect positively or negatively on the level of residential satisfaction in the case of the Walled City, Famagusta. Our findings can contribute to the decision makers of The Walled City to increase the level of residential satisfaction through enhancing either the negative or positive determinants.

Your participation in this research is completely voluntary.

There is no risk in participation in this research.

---

If you wish to participate in this study, please sign the form below.

Researcher signature \_\_\_\_\_

Participant's signature \_\_\_\_\_

(Date) \_\_\_\_\_

#### **Appendix: Socio- demographic characteristics**

| Gender                | Male       | Female      |            |            |        |
|-----------------------|------------|-------------|------------|------------|--------|
| Age                   | Below 18   | (19-30)     | (31-61)    | >61        |        |
| Monthly income family | <2000₺     | 2000-3000₺  | 3000-4000₺ | 4000-6000₺ | >6000₺ |
| Home ownership        | Owner      | Rental      |            |            |        |
| Length of residency   | <5 Years   | 5-10        | 10-20      | 20-40      | >40    |
| Ethnicity             | Foreign    | Local       |            |            |        |
| Household size        | 1          | 2           | 3          | 4          | >4     |
| Profile of residence  | Inside HUQ | Outside HUQ |            |            |        |

#### **ECONOMIC SUSTAINABILITY PERFORMANCE FACTORS (ESPF)**

| S/N | ESPF            | 5(VI) | 4(I) | 3(SI) | 2(LI) | 1(LI) |
|-----|-----------------|-------|------|-------|-------|-------|
| 1   | Cost of housing | 5     | 4    | 3     | 2     | 1     |

|   |                                                   |   |   |   |   |   |
|---|---------------------------------------------------|---|---|---|---|---|
| 2 | Job creation in the form of home-based enterprise | 5 | 4 | 3 | 2 | 1 |
| 3 | Tenure options                                    | 5 | 4 | 3 | 2 | 1 |
| 4 | Suitability of housing acquisition process        | 5 | 4 | 3 | 2 | 1 |
| 5 | Cost of living within the gated community         | 5 | 4 | 3 | 2 | 1 |
| 6 | Adaptability of housing units for future needs    | 5 | 4 | 3 | 2 | 1 |

---

**SOCIAL SUSTAINABILITY PERFORMANCE FACTORS (SSPF)**

---

| S/N | SSPF                                                                               | 5(VI) | 4(I) | 3(SI) | 2(LI) | 1(LI) |
|-----|------------------------------------------------------------------------------------|-------|------|-------|-------|-------|
| 7   | Access to social infrastructure                                                    | 5     | 4    | 3     | 2     | 1     |
| 8   | Social networks capable of generating social capital                               | 5     | 4    | 3     | 2     | 1     |
| 9   | Provision of recreational/ sporting facilities                                     | 5     | 4    | 3     | 2     | 1     |
| 10  | Security and safety issues                                                         | 5     | 4    | 3     | 2     | 1     |
| 11  | Housing near to the places of work and worship                                     | 5     | 4    | 3     | 2     | 1     |
| 12  | Suitable management rules                                                          |       |      |       |       |       |
| 13  | Level of social mix in housing environment                                         | 5     | 4    | 3     | 2     | 1     |
| 14  | Quality of internal spaces of housing units                                        | 5     | 4    | 3     | 2     | 1     |
| 15  | Privacy in dwelling units                                                          | 5     | 4    | 3     | 2     | 1     |
| 16  | Contribution of public housing to the aesthetics of urban landscape and morphology | 5     | 4    | 3     | 2     | 1     |

---

**CULTURAL SUSTAINABILITY PERFORMANCE FACTORS (CSPF)**

---

| S/N | SSPF                                                           | 5(VI) | 4(I) | 3(SI) | 2(LI) | 1(LI) |
|-----|----------------------------------------------------------------|-------|------|-------|-------|-------|
| 17  | Architectural design of housing in relation to cultural values | 5     | 4    | 3     | 2     | 1     |
| 18  | Suitability of housing to occupants natural way of life        | 5     | 4    | 3     | 2     | 1     |

| 19                                                                            | Reflection of the unique historical and cultural characteristics of the area and its residents in the design and erection of new dwellings | 5            | 4           | 3            | 2            | 1            |
|-------------------------------------------------------------------------------|--------------------------------------------------------------------------------------------------------------------------------------------|--------------|-------------|--------------|--------------|--------------|
| <b>ENVIRONMENTAL/TECHNOLOGICAL SUSTAINABILITY PERFORMANCE FACTORS (ETSPF)</b> |                                                                                                                                            |              |             |              |              |              |
| <b>S/N</b>                                                                    | <b>ETSPF</b>                                                                                                                               | <b>5(VI)</b> | <b>4(I)</b> | <b>3(SI)</b> | <b>2(LI)</b> | <b>1(LI)</b> |
| 20                                                                            | Quality of housing environment                                                                                                             | 5            | 4           | 3            | 2            | 1            |
| 21                                                                            | Neighbourhood environmental quality                                                                                                        | 5            | 4           | 3            | 2            | 1            |
| 22                                                                            | Housing density/Building type                                                                                                              | 5            | 4           | 3            | 2            | 1            |
| 23                                                                            | Architectural solution to energy consumption issues (e.g. ventilation, lighting, building morphology)                                      | 5            | 4           | 3            | 2            | 1            |
| 24                                                                            | Construction techniques and materials                                                                                                      | 5            | 4           | 3            | 2            | 1            |
| 25                                                                            | Landscaping elements                                                                                                                       | 5            | 4           | 3            | 2            | 1            |
| 26                                                                            | Reduced dependency on car within the gated                                                                                                 | 5            | 4           | 3            | 2            | 1            |
| 27                                                                            | Storm water discharge system                                                                                                               | 5            | 4           | 3            | 2            | 1            |
| 28                                                                            | Waste management system                                                                                                                    | 5            | 4           | 3            | 2            | 1            |
| 29                                                                            | Main sources of power and water supply                                                                                                     | 5            | 4           | 3            | 2            | 1            |
| 30                                                                            | Open Spaces and Green areas                                                                                                                | 5            | 4           | 3            | 2            | 1            |

**Please list other factors that will affect your satisfaction in a historic urban quarter.**
